# Supplementary material
Source: PubMed Central journal article supplement (PMC5240930)
Supplement: NIHMS824930-supplement-supplement_1.pdf [file NIHMS824930-supplement-supplement_1.pdf]

**Disability-Free Life Expectancy in the US Older Population Over 30 Years: Appendix.**

**Exhibit A1. Number of years expected to be lived with and without disability at age 65 and 85, 1982 and 2011, by race and gender**

|                                               | All  |      |                     |                         |                         | Men  |      |                     |                         |                         | Women |      |                     |                         |                         |
|-----------------------------------------------|------|------|---------------------|-------------------------|-------------------------|------|------|---------------------|-------------------------|-------------------------|-------|------|---------------------|-------------------------|-------------------------|
|                                               | 1982 | 2011 | Tests of Difference |                         |                         | 1982 | 2011 | Tests of Difference |                         |                         | 1982  | 2011 | Tests of Difference |                         |                         |
|                                               |      |      | 2011 vs. 1982       | Black vs. White in 1982 | Black vs. White in 2011 |      |      | 2011 vs. 1982       | Black vs. White in 1982 | Black vs. White in 2011 |       |      | 2011 vs. 1982       | Black vs. White in 1982 | Black vs. White in 2011 |
| <b>At Age 65</b>                              |      |      |                     |                         |                         |      |      |                     |                         |                         |       |      |                     |                         |                         |
| <b>Number of Years Without Disability</b>     |      |      |                     |                         |                         |      |      |                     |                         |                         |       |      |                     |                         |                         |
| White                                         | 12.2 | 15.0 | ***                 |                         |                         | 11.0 | 15.7 | ***                 |                         |                         | 13.0  | 14.4 | ***                 |                         |                         |
| Black                                         | 9.8  | 12.0 | ***                 | ***                     | ***                     | 8.9  | 12.7 | ***                 | ***                     | **                      | 10.5  | 11.4 | *                   | ***                     | ***                     |
| <b>Percentage of Years Without Disability</b> |      |      |                     |                         |                         |      |      |                     |                         |                         |       |      |                     |                         |                         |
| White                                         | 73.5 | 75.8 | ***                 |                         |                         | 78.3 | 81.9 | ***                 |                         |                         | 70.5  | 71.4 |                     |                         |                         |
| Black                                         | 65.3 | 66.8 |                     | ***                     | ***                     | 71.6 | 74.3 |                     | ***                     | ***                     | 61.1  | 62.3 |                     | ***                     | ***                     |
| <b>Number of Years with Disability</b>        |      |      |                     |                         |                         |      |      |                     |                         |                         |       |      |                     |                         |                         |
| White                                         | 4.4  | 4.8  | ***                 |                         |                         | 3.0  | 3.5  | **                  |                         |                         | 5.5   | 5.8  |                     |                         |                         |
| Black                                         | 5.2  | 6.0  | **                  | ***                     | ***                     | 3.5  | 4.4  | *                   | *                       | **                      | 6.7   | 6.9  |                     | ***                     | ***                     |
| <b>At Age 85</b>                              |      |      |                     |                         |                         |      |      |                     |                         |                         |       |      |                     |                         |                         |
| <b>Number of Years Without Disability</b>     |      |      |                     |                         |                         |      |      |                     |                         |                         |       |      |                     |                         |                         |
| White                                         | 2.6  | 3.2  | ***                 |                         |                         | 2.5  | 4.7  | ***                 |                         |                         | 2.7   | 2.6  |                     |                         |                         |
| Black                                         | 2.2  | 2.1  |                     |                         | ***                     | 2.0  | 3.2  |                     |                         |                         | 2.3   | 1.7  |                     |                         | **                      |
| <b>Percentage of Years Without Disability</b> |      |      |                     |                         |                         |      |      |                     |                         |                         |       |      |                     |                         |                         |
| White                                         | 36.5 | 44.6 | ***                 |                         |                         | 42.9 | 62.2 | ***                 |                         |                         | 34.3  | 36.1 |                     |                         |                         |
| Black                                         | 31.9 | 31.0 |                     |                         | ***                     | 37.5 | 50.4 |                     |                         |                         | 29.6  | 24.1 |                     |                         | **                      |
| <b>Number of Years with Disability</b>        |      |      |                     |                         |                         |      |      |                     |                         |                         |       |      |                     |                         |                         |
| White                                         | 4.5  | 4.0  | ***                 |                         |                         | 3.3  | 2.9  |                     |                         |                         | 5.1   | 4.7  | *                   |                         |                         |
| Black                                         | 4.7  | 4.7  |                     |                         | **                      | 3.3  | 3.1  |                     |                         |                         | 5.6   | 5.3  |                     |                         |                         |

SOURCE: Authors' analysis of the 1982 National Long Term Care Study and 2011 National Health and Aging Trends Study.

\*p<.10, \*\* p<.05, \*\*\* p<.01
